# Supplementary material
Source: PubMed Central journal article supplement (PMC3188870)

**Figure 4.** Patterns of lymphoid organization in synovitis. Representative examples are shown for the two patterns. Original magnification, X200, hematoxylin-eosin. A: aggregate pattern of synovitis; B: diffuse inflammatory infiltrate without organizational structure.

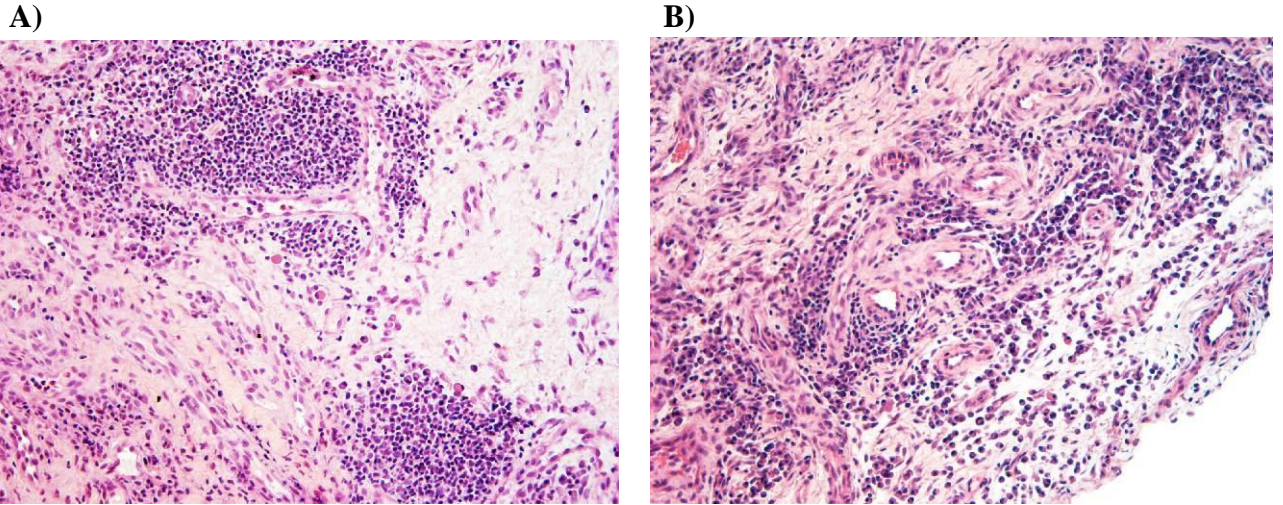

Supplement: 11_34_Michelutti_Suppl.pdf [file 11_34_Michelutti_Suppl.pdf]
